# Supplementary material for: Mat thickness associated with Didymosphenia geminata and Cymbella spp. in the southern rivers of Chile
Source: PeerJ. 2019 Feb 15;7:e6481. doi: 10.7717/peerj.6481 (PMC6381927; doi:10.7717/peerj.6481)
Supplement: Data S1 — Complete database obtained to this studie, including physicochemical variables and biological samples. ID , numerical indentification; season, season of sampling (S=spring, A=autumn); river, river name; altitude, m.a.s.l.; east , WGS 84 - UTM 19s; north , WGS 84 - UTM 19s; date, date of sampling; temp.w , °C; ph, unity; CE , μS/cm; Osat, %; other chemical variables in mg/l; prof , cm; depth.vel, m/s; density, total cel/mm3; richness, species number; cymbella.sp , cel/mm3; d.geminata, cel/mm3; mat.thick, cm. [file peerj-07-6481-s002.xlsx]

## Sheet: Hoja1
ID	season	river	altitude	east	north	date	temp.w	ph	CE	OD	Osat	Ca	P.tot	Fe	SiO2	prof	vel	density	richness	cymbella.sp	d.geminata	mat.thick
1	S	Biobio	527	279120	5791346	2013-11-19	9.825	8.5725	27.525	12.725	101.25	7.43	0.016	0.05	15.8	33	0.05	731.111	11	28	3.11111	0.4
2	S	Biobio	527	279120	5791346	2013-11-20	9.825	8.5725	27.525	12.725	101.25	7.43	0.016	0.05	15.8	40	0.4	1561.78	10	99.5556	6.22222	0.5
3	S	Biobio	527	279120	5791346	2013-11-21	9.825	8.5725	27.525	12.725	101.25	7.43	0.016	0.05	15.8	43	0.1	1806	10	31.5	21	0.2
4	S	Biobio	527	279120	5791346	2013-11-22	9.825	8.5725	27.525	12.725	101.25	7.43	0.016	0.05	15.8	43	0.05	2048	10	64	12.8	0.4
5	S	Biobio	527	279120	5791346	2013-11-23	9.825	8.5725	27.525	12.725	101.25	7.43	0.016	0.05	15.8	50	0.1	2826.99	10	41.985	27.99	1
6	S	Biobio	527	279120	5791346	2013-11-24	9.825	8.5725	27.525	12.725	101.25	7.43	0.016	0.05	15.8	51	0.5	1234.8	8	33.6	8.4	1
7	S	Biobio	1024	318370	5718351	2013-11-20	18.175	7.775	41.25	8.4525	102.5	4.79	0.003	0.06	21.4	51	0.2	326.4	11	28.8	32.4	0
8	S	Biobio	1024	318370	5718351	2013-11-21	18.175	7.775	41.25	8.4525	102.5	4.79	0.003	0.06	21.4	34	0.4	210.971	13	52.3687	44.8875	0
9	S	Biobio	1024	318370	5718351	2013-11-22	18.175	7.775	41.25	8.4525	102.5	4.79	0.003	0.06	21.4	32	0.2	170.24	18	17.29	66.5	0
10	S	Biobio	865	303929	5746370	2013-11-21	14.875	7.91333	48.3333	9.80667	115.025	5.48	0.008	0.15	20.1	48	1	195.51	8	139.65	18.62	0.7
11	S	Biobio	865	303929	5746370	2013-11-22	14.875	7.91333	48.3333	9.80667	115.025	5.48	0.008	0.15	20.1	50	0.05	207.529	12	86.4	4.23529	1.5
12	S	Biobio	865	303929	5746370	2013-11-23	14.875	7.91333	48.3333	9.80667	115.025	5.48	0.008	0.15	20.1	64	0.1	310.286	10	178.286	10.2857	1.5
13	S	Biobio	817	299618	5753716	2013-11-21	15.5	7.85	43.5	10.25	113.25	5.21	0.009	0.15	20.1	120	0.05	88.2162	12	34.5946	4.84324	0
14	S	Biobio	817	299618	5753716	2013-11-22	15.5	7.85	43.5	10.25	113.25	5.21	0.009	0.15	21.1	120	0.05	54.4	12	16.2667	0.8	0
15	S	Biobio	817	299618	5753716	2013-11-23	15.5	7.85	43.5	10.25	113.25	5.21	0.009	0.15	22.1	120	0.05	63.7	9	19.9333	4.76667	0
16	A	Currine	142	244481	5544160	2014-05-11	9.5	7.7	52.5	10.975	96.75	6.71	0.003	0.08	13.9	70	0.3	70.2512	14	6.25116	30.3628	0.5
17	A	Currine	142	244481	5544160	2014-05-12	9.5	7.7	52.5	10.975	96.75	6.71	0.003	0.08	13.9	66	0.1	79.1704	14	6.16296	47.8815	0.4
18	A	Currine	142	244481	5544160	2014-05-13	9.5	7.7	52.5	10.975	96.75	6.71	0.003	0.08	13.9	81	0.1	308.8	11	8	44.8	0.2
19	S	Biobio	726	298752	5768746	2013-11-21	15.7	7.44333	44.75	9.915	108.15	5.46	0.011	0.14	18.6	28	0.05	403.2	8	164.267	34.3467	0.1
20	S	Biobio	726	298752	5768746	2013-11-22	15.7	7.44333	44.75	9.915	108.15	5.46	0.011	0.14	18.6	28	0.05	376.067	11	112.02	160.029	0.3
21	S	Biobio	726	298752	5768746	2013-11-23	15.7	7.44333	44.75	9.915	108.15	5.46	0.011	0.14	18.6	28	0.05	178.08	12	86.52	5.88	0.4
22	S	Biobio	726	298752	5768746	2013-11-24	15.7	7.44333	44.75	9.915	108.15	5.46	0.011	0.14	18.6	16	0.4	180.48	16	64.64	19.84	0.3
23	S	Biobio	726	298752	5768746	2013-11-25	15.7	7.44333	44.75	9.915	108.15	5.46	0.011	0.14	18.6	16	0.4	100.4	14	40.4	8.4	0.2
24	S	Biobio	726	298752	5768746	2013-11-26	15.7	7.44333	44.75	9.915	108.15	5.46	0.011	0.14	18.6	16	0.4	33.475	10	6.175	1.625	0.5
25	S	Biobio	890.5	304806	5739125	2013-11-22	12.365	7.845	69.75	10.12	111.7	10.29	0.006	0.25	21.8	43	0.5	84.8	6	24.4	15.2	0.3
26	S	Biobio	890.5	304806	5739125	2013-11-23	12.365	7.845	69.75	10.12	111.7	10.29	0.006	0.25	21.8	44	0.3	260.4	6	0	33.6	0.3
27	S	Biobio	890.5	304806	5739125	2013-11-24	12.365	7.845	69.75	10.12	111.7	10.29	0.006	0.25	21.8	54	0.5	153.429	7	0	12.8571	0.4
28	S	Biobio	920	307873	5735979	2013-11-23	11.365	6.665	41.5	10.435	106.5	5.23	0.006	0.1	20.3	77	0.1	284.571	7	42.8571	3.42857	0.2
29	S	Biobio	920	307873	5735979	2013-11-24	11.365	6.665	41.5	10.435	106.5	5.23	0.006	0.1	20.3	40	0.05	36.5	12	2.5	0.25	0.6
30	S	Biobio	920	307873	5735979	2013-11-25	11.365	6.665	41.5	10.435	106.5	5.23	0.006	0.1	20.3	45	0.05	17.75	11	2	0.5	0.8
31	S	Biobio	920	307873	5735979	2013-11-26	11.365	6.665	41.5	10.435	106.5	5.23	0.006	0.1	20.3	46	0.2	138.428	11	0	6.45517	1
32	S	Biobio	920	307873	5735979	2013-11-27	11.365	6.665	41.5	10.435	106.5	5.23	0.006	0.1	20.3	65	0.4	305.723	10	149.169	26.5846	1
33	S	Biobio	920	307873	5735979	2013-11-28	11.365	6.665	41.5	10.435	106.5	5.23	0.006	0.1	20.3	86	0.5	166.32	10	56.88	13.68	0.7
34	S	Biobio	980	312939	5725239	2013-11-23	12.05	7.425	40	10.95	110.3	5.19	0.007	0.1	20.5	28	0.4	23.6667	7	0.666667	0	0
35	S	Biobio	980	312939	5725239	2013-11-24	12.05	7.425	40	10.95	110.3	5.19	0.007	0.1	20.5	28	0.05	141.45	5	0	0	0
36	S	Biobio	980	312939	5725239	2013-11-25	12.05	7.425	40	10.95	110.3	5.19	0.007	0.1	20.5	26	0.4	123.48	5	0	10.08	0
37	S	Biobio	1117	307318	5713369	2013-11-23	15.04	7.775	44.5	9.215	105.15	n/a	n/a	n/a	n/a	18	0.4	4.11667	7	0	0	0
38	S	Biobio	1117	307318	5713369	2013-11-24	15.04	7.775	44.5	9.215	105.15	n/a	n/a	n/a	n/a	33	0.1	4.5	9	0.15	0	0
39	S	Biobio	1117	307318	5713369	2013-11-25	15.04	7.775	44.5	9.215	105.15	n/a	n/a	n/a	n/a	31	0.1	129.15	18	4.9	27.65	1
40	S	Biobio	1117	307318	5713369	2013-11-26	15.04	7.775	44.5	9.215	105.15	n/a	n/a	n/a	n/a	54	0.05	64.6333	17	2.33333	4.2	0.5
41	S	Biobio	1117	307318	5713369	2013-11-27	15.04	7.775	44.5	9.215	105.15	n/a	n/a	n/a	n/a	35	0.1	175.467	12	2.24	6.72	1.2
42	S	Biobio	1117	307318	5713369	2013-11-28	15.04	7.775	44.5	9.215	105.15	n/a	n/a	n/a	n/a	23	0.4	36.5	18	0.5	16	0
43	A	Llanquihue	127	235890	5587413	2014-05-14	11	7.4	38.5	10.375	94.5	5.4	0.006	0.05	15	44	0.2	137.037	13	0	2.22222	0.2
44	A	Llanquihue	127	235890	5587413	2014-05-15	11	7.4	38.5	10.375	94.5	5.4	0.006	0.05	15	62	0.1	40.0941	15	0.564706	0	0.1
45	A	Llanquihue	127	235890	5587413	2014-05-16	11	7.4	38.5	10.375	94.5	5.4	0.006	0.05	15	26	0.1	214.667	5	3.06667	0	0.2
46	A	Huahum	598	269096	5559279	2014-05-14	10.3	7.75	42.5	9.675	93.05	n/a	n/a	n/a	n/a	51	0.1	274.4	14	0	0	0.3
47	A	Huahum	598	269096	5559279	2014-05-15	10.3	7.75	42.5	9.675	93.05	n/a	n/a	n/a	n/a	63	0.3	363.116	11	0	0	0.1
48	A	Huahum	598	269096	5559279	2014-05-16	10.3	7.75	42.5	9.675	93.05	n/a	n/a	n/a	n/a	13	0.4	684.444	4	0	3.11111	1.4
49	A	Huahum	596	268436	5564982	2014-05-14	10	7.6	43.75	10.175	97.2	6.47	0.002	0.03	10.9	76	0.4	14.1037	9	0.414815	1.24444	0.2
50	A	Huahum	596	268436	5564982	2014-05-15	10	7.6	43.75	10.175	97.2	6.47	0.002	0.03	10.9	52	0.3	29.037	9	2.07407	0.518519	0.2
51	A	Huahum	596	268436	5564982	2014-05-16	10	7.6	43.75	10.175	97.2	6.47	0.002	0.03	10.9	38	0.6	167.067	13	0.933333	0.933333	0.3
52	S	Liucura_Tolten	266	250755	5649885	2013-11-27	10	7.615	48.6667	9.875	90.25	5.34	0.033	0.03	22.7	48	0.1	26.1333	10	0	0	0
53	S	Liucura_Tolten	266	250755	5649885	2013-11-28	10	7.615	48.6667	9.875	90.25	5.34	0.033	0.03	22.7	45	0.1	4.44167	12	0	0	0
54	S	Liucura_Tolten	266	250755	5649885	2013-11-29	10	7.615	48.6667	9.875	90.25	5.34	0.033	0.03	22.7	40	0.1	190.729	12	0	0	0
55	S	Liucura_Tolten	266	250755	5649885	2013-11-30	10	7.615	48.6667	9.875	90.25	5.34	0.033	0.03	22.7	45	0.4	205	14	0	0	0
56	S	Pucon	243	249501	5648695	2013-11-27	10.3	7.4	61	10.4	95	5.9	0.033	0.05	22.9	100	0.3	668.889	13	2.22222	0	0
57	S	Pucon	233	247950	5648811	2013-11-27	11.7	8.0525	51.25	10.55	97	5.7	0.03	0.07	23.5	19	0.05	5040	10	0	67.2	0
58	S	Pucon	233	247950	5648811	2013-11-28	11.7	8.0525	51.25	10.55	97	5.7	0.03	0.07	23.5	36	0.1	607.2	9	4.4	13.2	0
59	S	Pucon	233	247950	5648811	2013-11-29	11.7	8.0525	51.25	10.55	97	5.7	0.03	0.07	23.5	26	0.05	188.444	18	2.66667	3.55556	0
60	A	Pucon	s/i	247944	5648825	2014-05-18	8.6	7.425	45.25	9.475	83.475	5.32	0.024	0.12	20.8	44	0.4	138.756	7	0	0	0
61	A	Pucon	s/i	247944	5648825	2014-05-19	8.6	7.425	45.25	9.475	83.475	5.32	0.024	0.12	20.8	54	0.3	50.2303	10	0	0	0
62	A	Pucon	s/i	247944	5648825	2014-05-20	8.6	7.425	45.25	9.475	83.475	5.32	0.024	0.12	20.8	45	0.3	42.3184	10	0.440816	0	0
63	S	Llanquihue	179	239636	5587013	2013-12-02	11.925	7.25	43.5	11.05	103.7	4.64	0.018	0.01	17.5	45	0.1	574	12	5.6	53.2	0.4
64	S	Llanquihue	179	239636	5587013	2013-12-03	11.925	7.25	43.5	11.05	103.7	4.64	0.018	0.01	17.5	40	0.3	1172.18	11	0	22.9091	0.4
65	S	Llanquihue	179	239636	5587013	2013-12-04	11.925	7.25	43.5	11.05	103.7	4.64	0.018	0.01	17.5	50	0.1	700	11	0	77.5385	0.7
66	S	Huahum	616	268410	5564979	2013-12-02	13.4425	7.75333	47	9.35	95.25	6.79	0.003	0.01	15.6	10	0.05	345.4	12	0	2.2	0.5
67	S	Huahum	616	268410	5564979	2013-12-03	13.4425	7.75333	47	9.35	95.25	6.79	0.003	0.01	15.6	18	0.05	905.904	12	0	11.184	0.8
68	S	Huahum	616	268410	5564979	2013-12-04	13.4425	7.75333	47	9.35	95.25	6.79	0.003	0.01	15.6	30	0.05	683.023	8	3.99429	3.99429	0.7
69	S	Huahum	616	268410	5564979	2013-12-05	13.4425	7.75333	47	9.35	95.25	6.79	0.003	0.01	15.6	18	0.5	703.84	9	0	16.6	0
70	S	Huahum	616	268410	5564979	2013-12-06	13.4425	7.75333	47	9.35	95.25	6.79	0.003	0.01	15.6	22	0.05	586.88	9	105.28	20.16	1.2
71	S	Huahum	616	268410	5564979	2013-12-07	13.4425	7.75333	47	9.35	95.25	6.79	0.003	0.01	15.6	19	0.2	291.9	13	10.5	51.45	1.2
72	S	Enco	114.5	229891	5577589	2013-12-03	16.13	7.21	49	12.75	130.85	5	0.017	0.05	16.9	23	0.05	1608.32	15	13.44	22.4	0.25
73	S	Enco	114.5	229891	5577589	2013-12-04	16.13	7.21	49	12.75	130.85	5	0.017	0.05	17.9	24	0.05	550.978	15	0	2.17778	0.2
74	S	Enco	114.5	229891	5577589	2013-12-05	16.13	7.21	49	12.75	130.85	5	0.017	0.05	18.9	34	0.05	829.733	16	0	4.35556	0.2
75	A	Biobio	s/i	307366	5713357	2014-05-21	10.3	8.2	50	7.5	76.575	n/a	n/a	n/a	n/a	39	0.05	472.123	19	103.385	20.6769	0.5
76	A	Biobio	s/i	307366	5713357	2014-05-22	10.3	8.2	50	7.5	76.575	n/a	n/a	n/a	n/a	43	0.1	548.8	16	190.4	29.8667	0.5
77	A	Biobio	s/i	307366	5713357	2014-05-23	10.3	8.2	50	7.5	76.575	n/a	n/a	n/a	n/a	24	0.1	705.6	11	263.2	39.2	0.5
78	S	Enco	129	232041	5583083	2013-12-03	15.5	7.2	48.5	12.1	122.5	5.43	0.011	0.11	13.1	51	0.05	1493.01	14	0	5.11304	0.5
79	S	Enco	129	232041	5583083	2013-12-04	15.5	7.2	48.5	12.1	122.5	5.43	0.011	0.11	13.1	33	0.05	259.8	18	7.2	5.4	0
80	S	Enco	129	232041	5583083	2013-12-05	15.5	7.2	48.5	12.1	122.5	5.43	0.011	0.11	13.1	25	0.05	26.8815	17	0	0.844444	0
81	A	Lonquimay	s/i	302672	5742711	2014-05-22	5.8	7.4	65.5	8.125	71.375	8.69	0.018	0.28	19.7	50	0.2	834.695	14	0	0	0.4
82	A	Lonquimay	s/i	302672	5742711	2014-05-23	5.8	7.4	65.5	8.125	71.375	8.69	0.018	0.28	19.7	16	0.3	2464	11	0	0	0.2
83	A	Lonquimay	s/i	302672	5742711	2014-05-24	5.8	7.4	65.5	8.125	71.375	8.69	0.018	0.28	19.7	23	0.1	554.193	12	16.5926	0	0.3
84	A	Biobio	s/i	304806	5739113	2014-05-22	6.9	7.425	51.75	8.85	80.075	6.62	0.004	0.28	19	36	0.2	1610	11	42	21	0.1
85	A	Biobio	s/i	304806	5739113	2014-05-23	6.9	7.425	51.75	8.85	80.075	6.62	0.004	0.28	19	40	0.1	266.311	11	6.22222	1.24444	0.2
86	A	Biobio	s/i	304806	5739113	2014-05-24	6.9	7.425	51.75	8.85	80.075	6.62	0.004	0.28	19	40	0.3	736	11	11.4286	11.4286	0.3
87	A	Biobio	s/i	307872	5736013	2014-05-22	7	7.75	52	9	82.05	7.07	0.005	0.51	20.3	45	0.05	75.1333	17	1.86667	0	0.4
88	A	Biobio	s/i	307872	5736013	2014-05-23	7	7.75	52	9	82.05	7.07	0.005	0.51	20.3	25	0.05	71.8667	13	0	2.17778	0.2
89	A	Biobio	s/i	307872	5736013	2014-05-24	7	7.75	52	9	82.05	7.07	0.005	0.51	20.3	37	0.05	282.8	12	1.4	7	0.1
90	A	Biobio	s/i	312947	5725289	2014-05-22	7.2	7.6	48.25	8.85	81.45	6.02	0.003	0.09	19.7	29	0.6	130.178	11	0	0.42963	0.05
91	A	Biobio	s/i	312947	5725289	2014-05-23	7.2	7.6	48.25	8.85	81.45	6.02	0.003	0.09	19.7	46	0.2	439.2	14	5.4	1.8	0.1
92	A	Biobio	s/i	312947	5725289	2014-05-24	7.2	7.6	48.25	8.85	81.45	6.02	0.003	0.09	19.7	39	0.5	336	11	0	0	0.1
93	A	Biobio	s/i	298624	5768762	2014-05-24	4.4	7.675	45.5	7.775	65.15	7.03	0.005	0.13	20.3	38	0.1	336.242	14	0	2.30303	0
94	A	Biobio	s/i	298624	5768762	2014-05-25	4.4	7.675	45.5	7.775	65.15	7.03	0.005	0.13	20.3	33	0.4	357.987	9	0	0	0
95	A	Biobio	s/i	298624	5768762	2014-05-26	4.4	7.675	45.5	7.775	65.15	7.03	0.005	0.13	20.3	38	0.1	1949.33	11	63.4667	0	0
96	A	Biobio	s/i	299627	5753714	2014-05-24	4.95	8.1	56.5	8.55	73.75	6.53	0.006	0.14	21.4	10	0.05	1070.78	14	68.0842	12.3789	3
97	A	Biobio	s/i	303921	5746413	2014-05-24	6.125	7.825	59	8.45	75.35	6.47	0.007	0.16	21.6	29	0.1	160.16	15	2.34667	0.586667	0
98	A	Biobio	s/i	303921	5746413	2014-05-25	6.125	7.825	59	8.45	75.35	6.47	0.007	0.16	21.6	31	0.4	225.867	14	1.86667	0	0
99	A	Biobio	s/i	303921	5746413	2014-05-26	6.125	7.825	59	8.45	75.35	6.47	0.007	0.16	21.6	45	0.05	155.692	15	2.70769	0	0
100	A	Biobio	s/i	318358	5718384	2014-05-24	9	8.35	49	7.975	78	5.85	0.003	0.05	20.3	54	0.1	1337.89	18	6.10909	54.9818	0.7
101	A	Biobio	s/i	318358	5718384	2014-05-25	9	8.35	49	7.975	78	5.85	0.003	0.05	20.3	45	0.1	773.818	17	5.4303	46.1576	0.4
102	A	Biobio	s/i	318358	5718384	2014-05-26	9	8.35	49	7.975	78	5.85	0.003	0.05	20.3	36	0.6	405.148	12	0	17.5304	1.5
103	A	Biobio	s/i	279107	5791354	2014-05-27	8.375	7.95	51.5	10.45	94.65	8.31	0.005	0.11	19.3	53	0.2	900.48	8	0	0	0.5
104	A	Biobio	s/i	279107	5791354	2014-05-28	8.375	7.95	51.5	10.45	94.65	8.31	0.005	0.11	19.3	50	0.05	482.844	9	2.48889	0	0.7
105	A	Biobio	s/i	279107	5791354	2014-05-29	8.375	7.95	51.5	10.45	94.65	8.31	0.005	0.11	19.3	18	0.9	795.2	7	16.8	5.6	1.2
106	A	Laja	s/i	241201	5863201	2014-05-28	12.05	8.2	77.75	9.9	96.25	8.95	0.02	0.04	28.5	42	0.05	2352	7	0	0	0.3
107	S	San_Pedro	27	181260	5587702	2013-12-11	17.6325	7.76	44	9.7525	101.75	5.95	0.008	0.06	14.1	24	0.4	85.9259	21	4.14815	0	2.5
108	A	Laja	s/i	241201	5863201	2014-05-28	12.05	8.2	77.75	9.9	96.25	8.95	0.02	0.04	28.5	18	0.1	960	13	0	0	0.4
109	A	Laja	s/i	241201	5863201	2014-05-28	12.05	8.2	77.75	9.9	96.25	8.95	0.02	0.04	28.5	36	0.2	184.178	8	0	0	0.2
110	S	San_Pedro	27	181260	5587702	2013-12-11	17.6325	7.76	44	9.7525	101.75	5.95	0.008	0.06	14.1	25	0.3	432.444	15	10.8889	12.4444	2
111	S	San_Pedro	27	181260	5587702	2013-12-11	17.6325	7.76	44	9.7525	101.75	5.95	0.008	0.06	14.1	30	0.2	505.2	17	8.4	8.4	2
112	A	Laja	559	265983	5867725	2014-05-28	9.2	7.9	66.75	10.475	97.5	n/a	n/a	n/a	n/a	11	0.2	264.847	10	0	0	0.4
113	A	Laja	559	265983	5867725	2014-05-29	9.2	7.9	66.75	10.475	97.5	n/a	n/a	n/a	n/a	30	0.1	836.267	12	0	0	0.3
114	A	Laja	559	265983	5867725	2014-05-30	9.2	7.9	66.75	10.475	97.5	n/a	n/a	n/a	n/a	10	0.1	408.178	6	0	0	0.2
115	S	Llanquihue	137.5	235834	5587370	2013-12-11	16.1	8.32	48.25	9.85	101.625	6.5	0.03	0.05	16.5	31	0.1	806.4	15	0	14.9333	0.5
116	S	Llanquihue	137.5	235834	5587370	2013-12-12	16.1	8.32	48.25	9.85	101.625	6.5	0.03	0.05	16.5	35	0.1	1659.26	15	24.8889	24.8889	1.5
117	S	Llanquihue	137.5	235834	5587370	2013-12-13	16.1	8.32	48.25	9.85	101.625	6.5	0.03	0.05	16.5	44	0.1	2011.37	14	32.4414	32.4414	1
118	S	Fuy	209	243533	5587436	2013-12-12	14.2125	7.84	52.5	9.1775	91.55	6.54	0.015	0.01	17.3	70	0.05	1491.84	16	0	74.88	0.2
119	S	Fuy	209	243533	5587436	2013-12-13	14.2125	7.84	52.5	9.1775	91.55	6.54	0.015	0.01	17.3	21	0.05	2609.6	12	0	67.2	0.2
120	S	Fuy	209	243533	5587436	2013-12-14	14.2125	7.84	52.5	9.1775	91.55	6.54	0.015	0.01	17.3	40	0.05	2102.9	14	5.7931	52.1379	0.1
121	S	Fuy	209	243533	5587436	2013-12-15	14.2125	7.84	52.5	9.1775	91.55	6.54	0.015	0.01	17.3	21	0.6	4057.2	13	0	156.8	0.2
122	S	Fuy	209	243533	5587436	2013-12-16	14.2125	7.84	52.5	9.1775	91.55	6.54	0.015	0.01	17.3	30	0.3	3142.53	15	0	124.133	0.2
123	S	Fuy	209	243533	5587436	2013-12-17	14.2125	7.84	52.5	9.1775	91.55	6.54	0.015	0.01	17.3	61	0.2	2744	11	0	67.2	0.2
